# Supplementary material
Source: ML conference proceedings conference paper supplement (https://proceedings.neurips.cc/paper_files/paper/2012/hash/92fb0c6d1758261f10d052e6e2c1123c-Abstract.html)
Supplement: Supplementary file 1 [file 92fb0c6d1758261f10d052e6e2c1123c-Supplemental.zip]

Archive with 1 entries (1 files):
- nips2012-active-comparison-appendix.pdf
